# Supplementary material
Source: PubMed Central journal article supplement (PMC4528677)

# Supplemental Figure 1

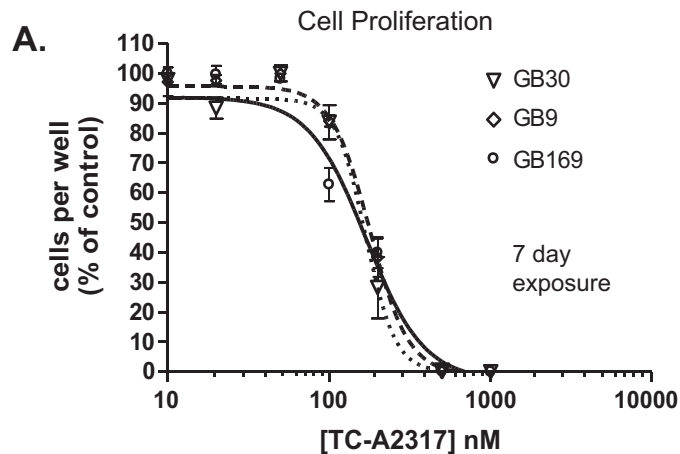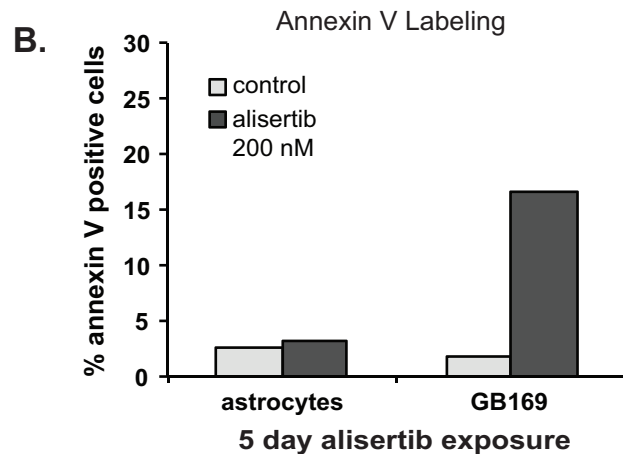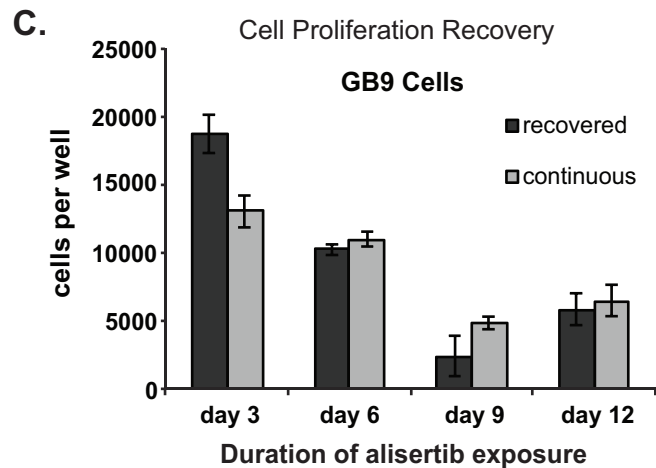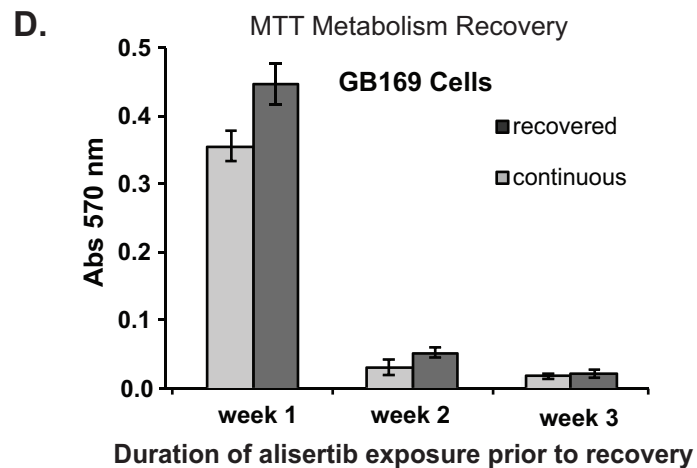

Supplement: NIHMS710487-supplement-1.pdf [file NIHMS710487-supplement-1.pdf]

# Supplemental Figure 2

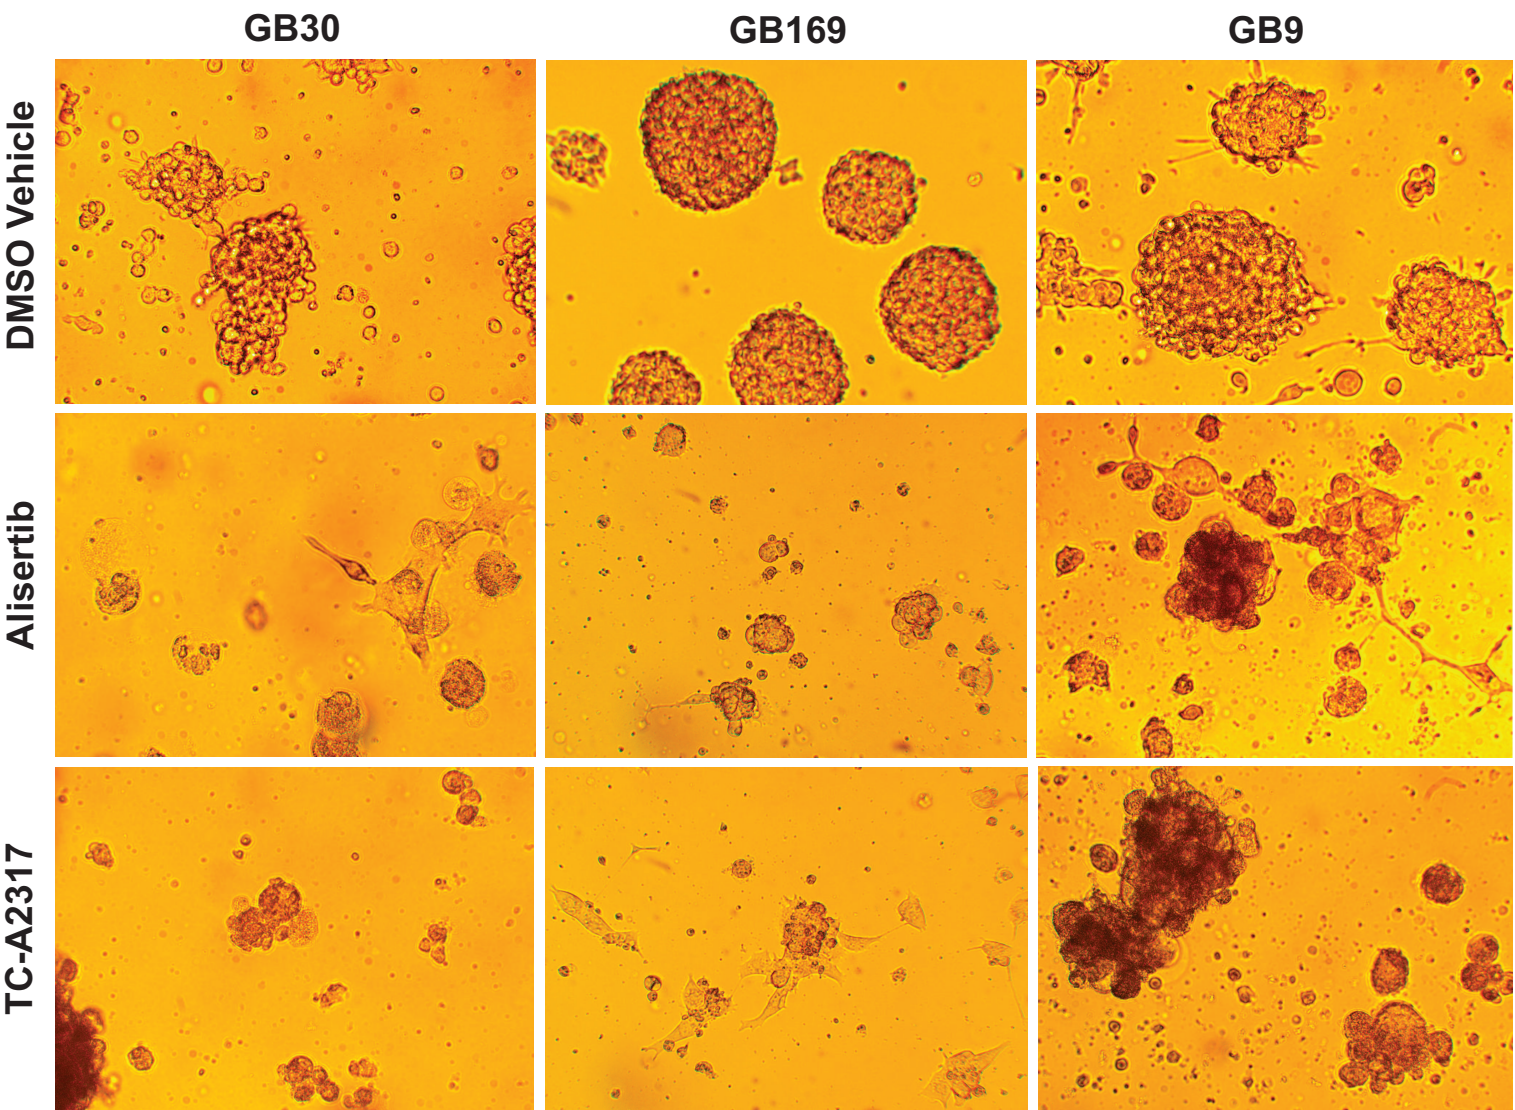

Supplement: NIHMS710487-supplement-2.pdf [file NIHMS710487-supplement-2.pdf]

# Supplemental Figure 3

**A.**

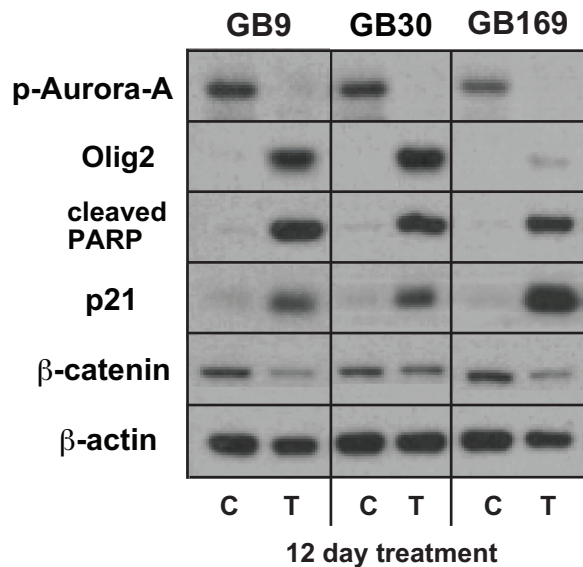

C: Control (DMSO Only)  
T: 1  $\mu$ M TC-A2317

**B.**

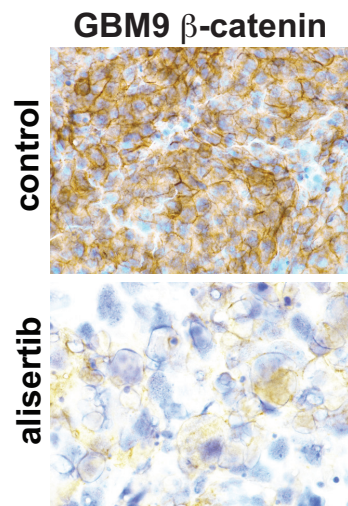

Supplement: NIHMS710487-supplement-3.pdf [file NIHMS710487-supplement-3.pdf]
